# Supplementary material for: Isolation and Identification of Post-Transcriptional Gene Silencing-Related Micro-RNAs by Functionalized Silicon Nanowire Field-effect Transistor
Source: PubMed Central journal article supplement (PMC4663627; doi:10.1038/srep17375), 2015-11-30
Supplement: srep17375-s1.pdf [file srep17375-s1.pdf]

## Supporting Information

### Isolation and Identification of Post-Transcriptional Gene Silencing-Related Micro-RNAs by Functionalized Silicon Nanowire Field-effect Transistor

Kuan-I Chen<sup>1,2</sup>, Chien-Yuan Pan<sup>3</sup>, Keng-Hui Li<sup>1</sup>, Ying-Chih Huang<sup>4</sup>, Chia-Wei Lu<sup>4</sup>, Chuan-Yi Tang<sup>5</sup>, Ya-Wen Su<sup>6</sup>, Ling-Wei Tseng<sup>1</sup>, Kun-Chang Tseng<sup>1,2</sup>, Chi-Yun Lin<sup>1</sup>, Chii-Dong Chen<sup>7</sup>, Shih-Shun Lin<sup>4,8\*</sup>, Yit-Tsong Chen<sup>1,2\*</sup>

<sup>1</sup>Department of Chemistry, National Taiwan University, Taipei 106, Taiwan

<sup>2</sup>Institute of Atomic and Molecular Sciences, Academia Sinica, P.O. Box 23-166, Taipei 106, Taiwan

<sup>3</sup>Department of Life Science, National Taiwan University, Taipei 106, Taiwan

<sup>4</sup>Institute of Biotechnology, National Taiwan University, Taipei 106, Taiwan

<sup>5</sup>Department of Computer Science, National Tsing Hua University, Hsinchu 300, Taiwan

<sup>6</sup>National Nano Device Laboratories, Hsinchu 300, Taiwan

<sup>7</sup>Institute of Physics, Academia Sinica, Taipei 115, Taiwan

<sup>8</sup>Agriculture Biotechnology Research Center, Academia Sinica, Taipei 115, Taiwan

*\*Corresponding author: E-mail: ytcchem@ntu.edu.tw; Fax: +886-2-3366-8671; E-mail: linss01@ntu.edu.tw; Fax: +886-2-3366-6001*

Table S1. Predicted pre-miRNAs yielding the paired sRNAs

| No. | miRNA ID | Location <sup>a</sup><br>(nucleotide) | Reads <sup>b</sup> |               |               |               | <i>N. benthamiana</i><br>genomic contig ID |
|-----|----------|---------------------------------------|--------------------|---------------|---------------|---------------|--------------------------------------------|
|     |          |                                       | Total              |               | Eluted        |               |                                            |
|     |          |                                       | 5'-<br>strand      | 3'-<br>strand | 5'-<br>strand | 3'-<br>strand |                                            |
| 1   | 21956    | 16326-16385                           | 23                 | 299           | 36            | 79            | Niben044Scf00022111                        |
| 2   | 140486   | 3698-3783                             | 4                  | 207           | 39            | 49            | Niben044ctg26199327                        |
| 3   | 32913    | 9345-9438                             | 401                | 628           | 62            | 108           | Niben044scf00033254                        |
| 4   | 21409    | 9750-9883                             | 428                | 50231         | 35            | 16420         | Niben044scf0021673                         |
| 5   | 6873     | 64319-64586                           | 194                | 24            | 172           | 117           | Niben044scf00006983                        |
| 6   | 37443    | 31216-31573                           | 6570               | 924           | 3703          | 235           | Niben044scf0037814                         |
| 7   | 16712    | 52681-53224                           | 71                 | 0             | 54            | 30            | Niben044scf00016874                        |
| 8   | 11818    | 238382-239250                         | 2                  | 3             | 36            | 44            | Niben044scf00011819                        |
| 9   | 20111    | 3622-4500                             | 0                  | 189           | 33            | 91            | Niben044scf00020348                        |

<sup>a</sup>The position of the predicted miRNA gene bases on the sequence of the genomic contigs of *Nicotiana benthamiana*.

<sup>b</sup>The number of each sRNAs sequenced in the total and eluted sRNA.

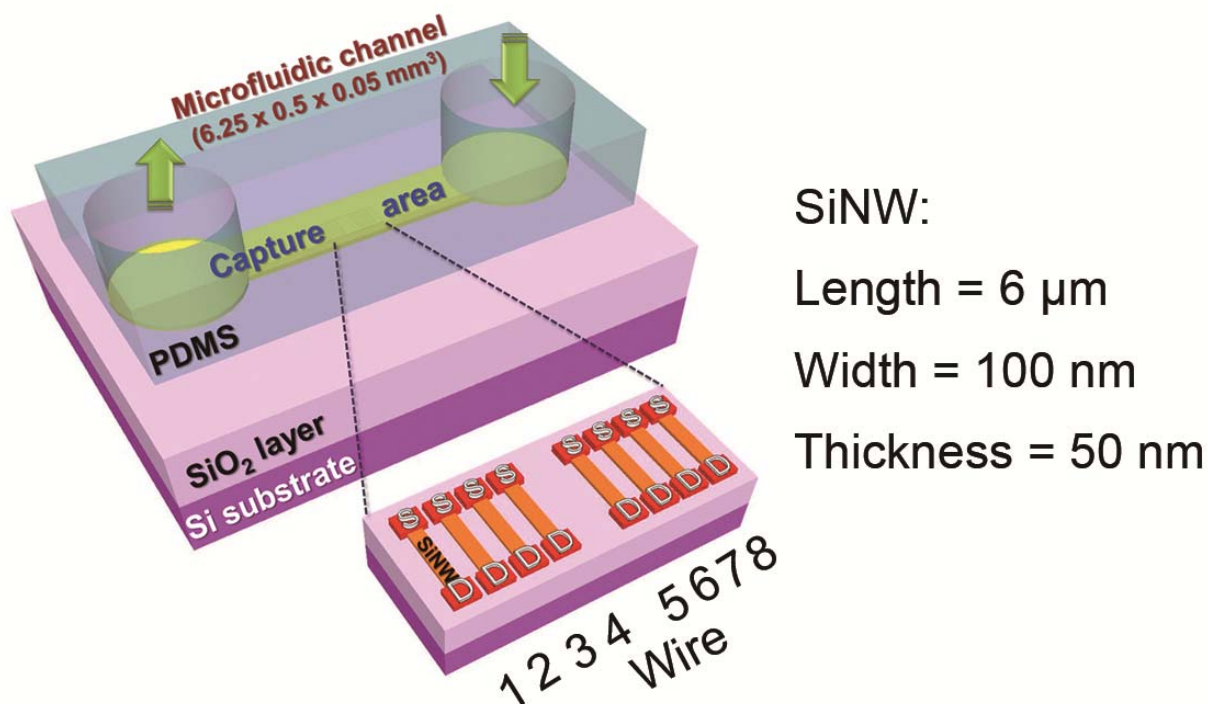

**Figure S1. An illustrative representation of eight SiNW-FET devices and the capture area on an SOI chip.**

The eight SiNW-FETs are labelled in numerical order. The capture area beneath the PDMS microfluidic channel covers not only minute SiNW-FET surfaces but also the vast surrounding substrate surface. Because a SiO<sub>2</sub> layer was coated on the capture area, the immobilization of receptors (e.g., DNA<sup>probe</sup> and p19 in this study), the binding of targets (miRNA and ds-sRNA), and the elution of the receptor-target complexes (DNA-miRNA and p19-ds-sRNA) occurred on the entire region of the capture area.

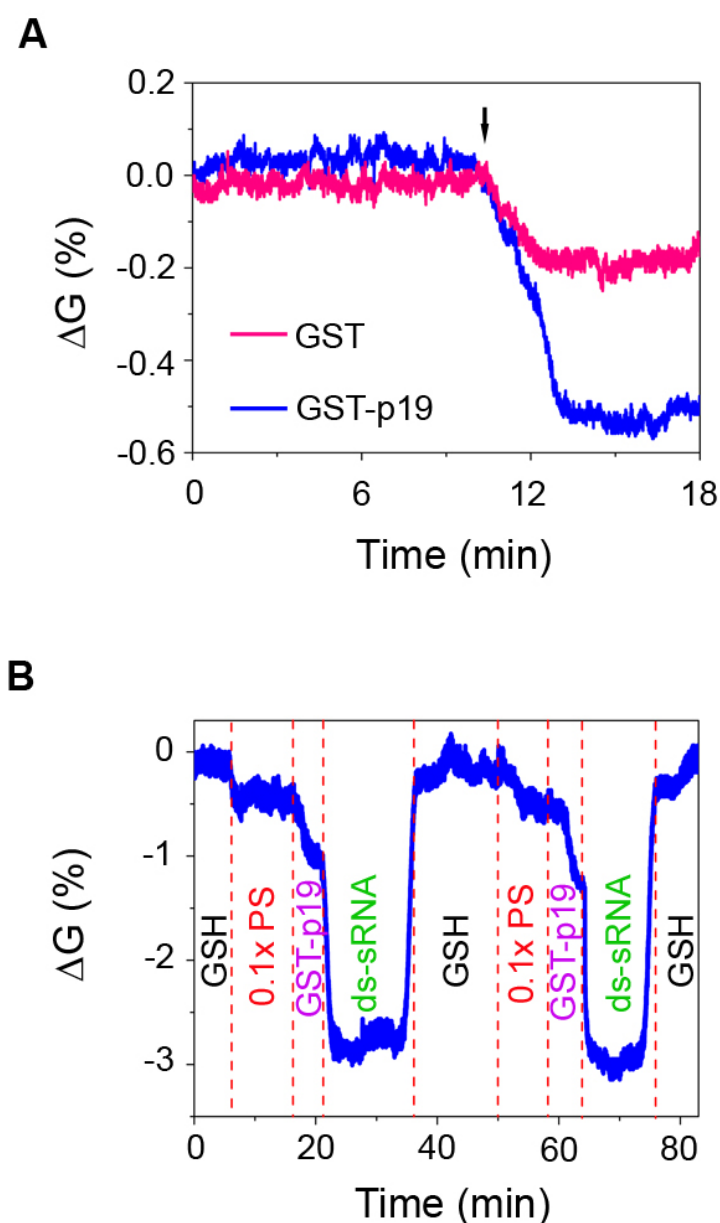

**Figure S2. The binding tests of ds-sRNAs to a p19/SiNW-FET.**

(A). The electrical conductance changes ( $\Delta G$ s) of a GSH/SiNW-FET responded to the associations of GST (red trace) and GST-p19 (blue trace), respectively. (B). A reusable SiNW-FET biosensor was demonstrated by the reproducibility of the electrical conductance changes ( $\Delta G$ s) of a GSH/SiNW-FET endured in the two complete cycles of GSH washing, 0.1 $\times$  PS flushing, GST-p19 immobilization, and ds-sRNA binding. The reproducible  $\Delta G$  at each repeated step demonstrated the operating stability and device reusability of the SiNW-FET system.



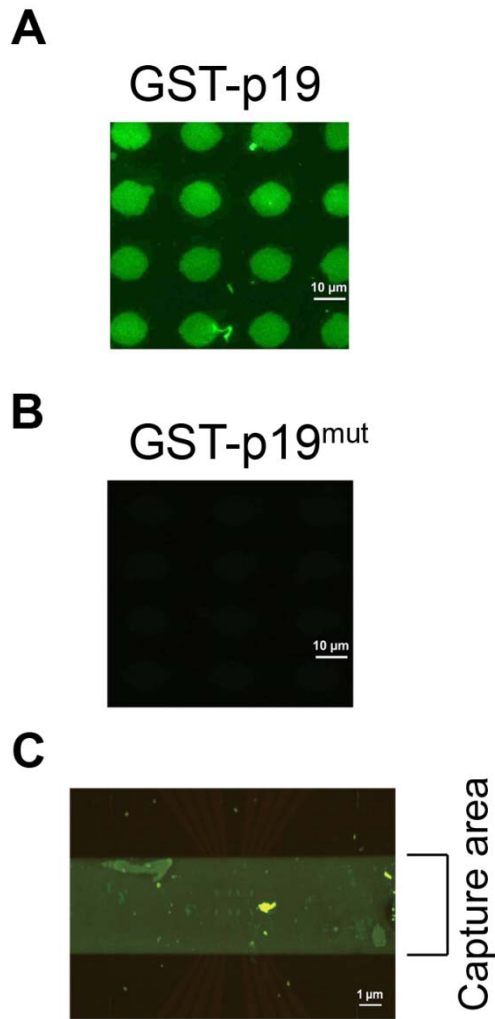

**Figure S4. Successful surface modification proved by fluorescence imaging examination.**

(A). Binding of 21-nucleotide ds-sRNA to the p19-modified micropatterns. Green fluorescence indicates the successful association of 5'-fluorescein isothiocyanate (FITC)-ds-sRNAs with the p19-modified micropatterns. (B). No fluorescence could be observed for the 21-nucleotide ds-sRNA binding to the p19<sup>mut</sup>-modified micropatterns, suggesting that the four mutated amino acids of p19<sup>mut</sup> are crucial to the binding of the ds-sRNA. (C). Visualization of the ds-sRNA captured by p19 over the entire capture area (as illustrated in Figure S1). Green fluorescence indicates that 5'-FITC-ds-sRNAs were captured by the p19 immobilized on the surface of the entire capture area.

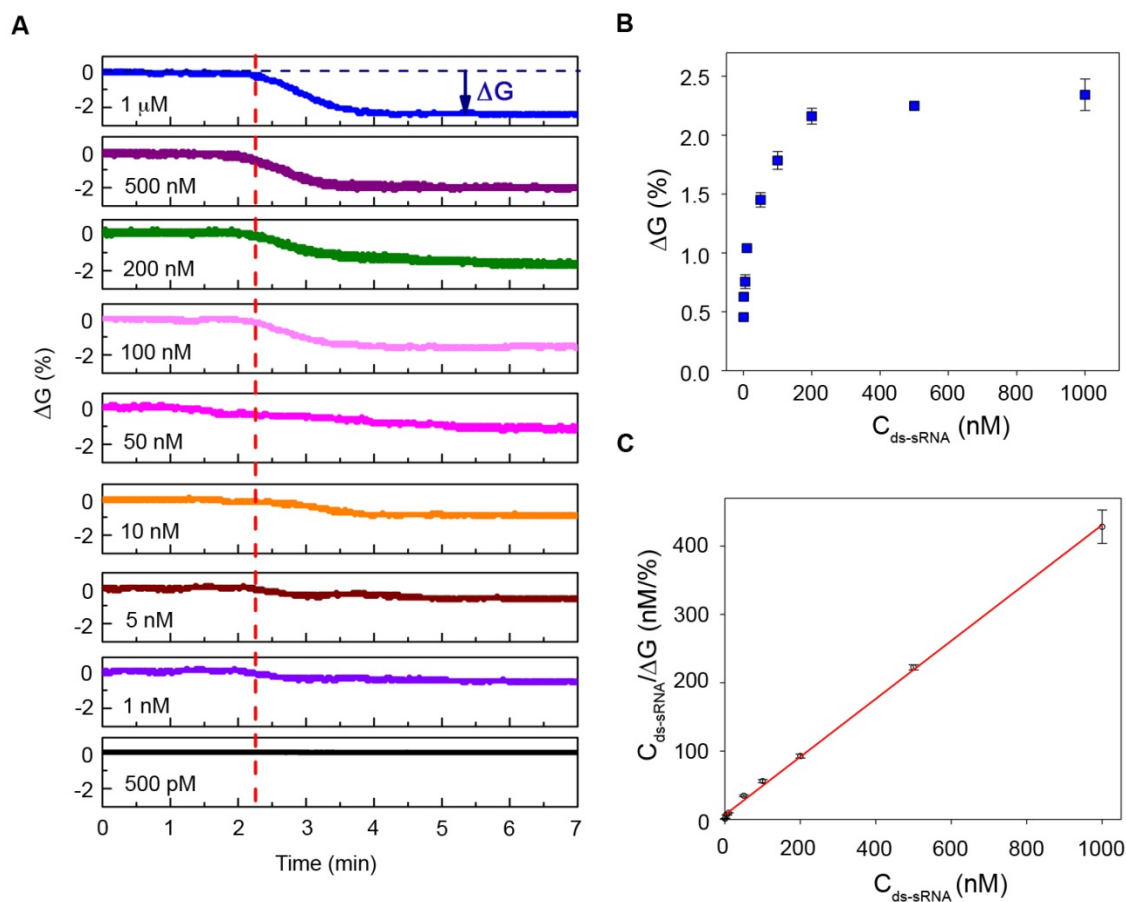

**Figure S5. Determination of the dissociation constant ( $K_d$ ) of the p19-ds-sRNA complex.**

(A). The electrical conductance changes ( $\Delta G$ s) of a p19/SiNW-FET after introducing various concentrations of ds-sRNAs at 500 pM–1  $\mu$ M. The vertical red-dotted line indicates the addition of ds-sRNA samples. (B). The  $\Delta G$  values are presented as a function of ds-sRNA concentration ( $C_{ds-sRNA}$ ) where the data points are taken from (A). (C). A least-squares fit of the  $C_{ds-sRNA} / \Delta G$  vs.  $C_{ds-sRNA}$ . The data points fit to the Langmuir adsorption isotherm model (Eq. 1) yielded  $K_d = 15.9 \pm 4.8$  nM for the p19-ds-sRNA complex.

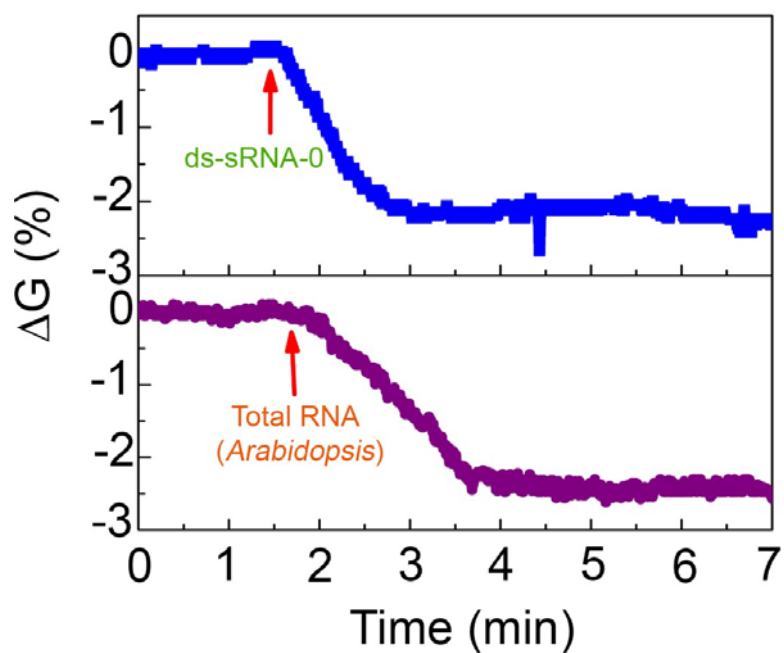

**Figure S6. Detections of synthetic ds-sRNAs and total extracted RNA by p19/SiNW-FET.**

The normalized  $\Delta G$  of a p19/SiNW-FET in the detection of (upper panel) synthetic ds-sRNA-0 or (lower panel) the total RNA extracted from *Arabidopsis thaliana*. The decrease of  $\Delta G$  is due to the gating effect of the negatively charged phosphate backbone of ds-sRNA-0 to the *n*-type p19/SiNW-FET.



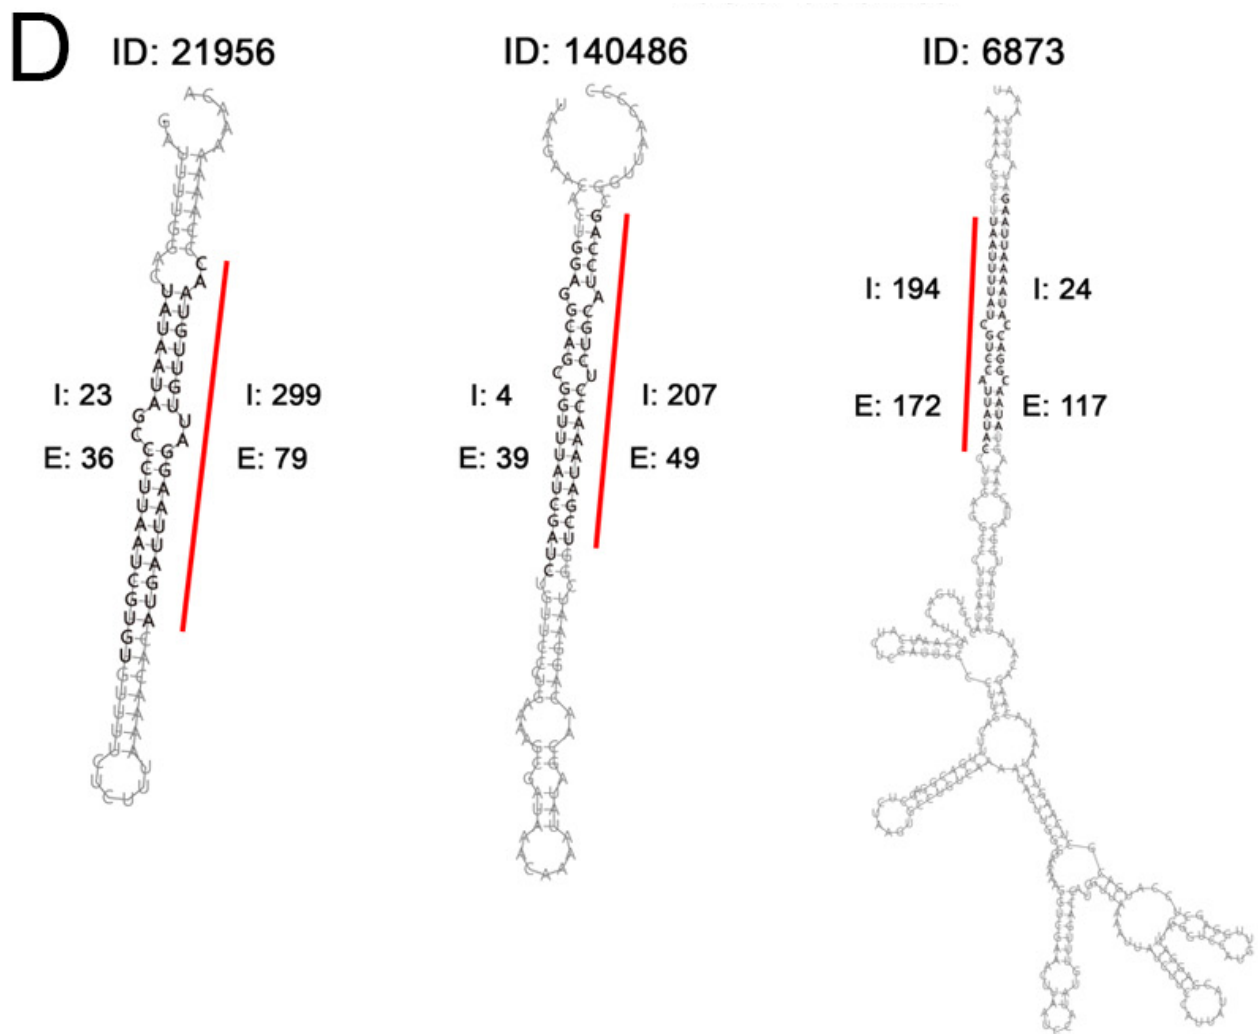

**Figure S7. A magnified image of Figure 3D for easier reading.**
